# Supplementary material for: Aggregation/disaggregation of chlorophyll a in model phospholipid—detergent vesicles and micelles
Source: Royal Society of Chemistry journal article supplement (doi:10.1039/c3pp50419k), 2014-03-05
Supplement: c3pp50419k1.pdf [file c3pp50419k1.pdf]

## **ELECTRONIC SUPPLEMENTARY INFORMATION**

*for the Article*

### **Aggregation/Disaggregation of Chlorophyll $\alpha$ in Model Phospholipid–Detergent Vesicles and Micelles**

**Raquel F. Correia,<sup>1,2</sup> M. Isabel Viseu,<sup>1,\*</sup> Suzana M. Andrade<sup>1</sup>**

<sup>1</sup> *Centro de Química Estrutural, Instituto Superior Técnico, Universidade de Lisboa, 1049-001 Lisboa, Portugal*

<sup>2</sup> *Present address: Dipartimento di Scienze Chimiche e Geologiche, University of Cagliari, Cittadella di Monserrato, I-09042 Monserrato–Cagliari, Italy*

\* **Corresponding author. Phone:** +351-21-8419389; **E-mail:** [isabelviseu@tecnico.ulisboa.pt](mailto:isabelviseu@tecnico.ulisboa.pt)

#### **Covered Topics**

- 1. Turbidity Correction of Electronic Absorption Spectra of Chlorophyll  $\alpha$  In DMPC–DTAC Media**
- 2. Parameters of Electronic Absorption Spectra of Chlorophyll  $\alpha$  in DMPC–DTAC Media**
- 3. Steady-State Fluorescence of Chlorophyll  $\alpha$  in DTAC Media**
- 4. Fluorescence Lifetimes of Chlorophyll  $\alpha$  in DMPC–DTAC Media**
- 5. FLIM Images of Chlorophyll  $\alpha$  in DTAC Pre-Micelle Media**
- 6. FCS Parameters for Chlorophyll  $\alpha$  in DMPC–DTAC Media**

#### **Abbreviations**

**Chl**, **Ch**lorophyll;

**Chl  $\alpha$** , **Ch**lorophyll  **$\alpha$** ;

**DMPC**, 1,2-**D**imyristoyl-*sn*-glycero-3**p**hosphog**h**oline;

**DTAC**, **d**odecyl**t**rimethyl**a**mmonium **c**hloride.

## 1. Turbidity Correction of Electronic Absorption Spectra of Chlorophyll *a* in DMPC–DTAC Media

---

The absorption bands of [Figure 1](#) of the [Main Article](#) are presented after correction of background turbidity, by fitting the original chlorophyll *a* (Chl *a*) spectra to [eq. 1](#) of the [Main Article](#) (see also references [1,2] below). The empirical parameters obtained do not have a straightforward meaning, except for the parameter *c*, which depends on the dimensions of colloidal scattering particles relatively to the wavelength of incident radiation, and their size polydispersity [3]. This parameter is summarized in [Table S1](#) for typical situations.

**Table S1.** Empirical parameter *c* of [eq. 1](#) ([Main Article](#)), used for turbidity correction of the absorption spectra of Chl *a* in the DTAC–DMPC vesicles and micelles

| <b>Media</b>               | <b><i>c</i></b> |
|----------------------------|-----------------|
| <b>DMPC liposomes</b>      | 0.9             |
| <b>Vesicles, D:L = 0.3</b> | 2.4             |
| <b>Vesicles, D:L = 1.0</b> | 2.4             |
| <b>Vesicles, D:L = 2.0</b> | 2.0             |
| <b>Vesicles, D:L = 4.0</b> | 3.2             |
| <b>Vesicles, D:L = 6.7</b> | 2.3             |
| <b>Micelles, D:L = 20</b>  | 2.4             |
| <b>Micelles, D:L = 33</b>  | 3.5             |

The unexpectedly low value of *c* obtained in DMPC liposomes ( $c < 1$ ) may be explained by the huge size polydispersity of vesicles [3], in agreement with our DLS data (diameters around  $\approx 100$ – $10000$  nm) [4]. For D:L ratios  $\approx 0.3$ – $20$ , *c* is almost constant, at  $\approx 2.0$ – $2.4$ , meaning that quite large structures (vesicles, cylindrical micelles) exist in these solutions, accordingly to DLS data [4]; the slightly larger *c* value at D:L = 4 (3.2) is an exception: it accounts for *smaller* and *less polydisperse* structures: spontaneous ULVs and disks, which coexist around this D:L ratio and have mean equivalent diameters  $\approx 100$  and  $\approx 30$  nm, respectively [4]. Only at D:L = 33 *c* approaches the value of 4, typical of very small scattering particles (spherical micelles) [3].

## 2. Parameters of Electronic Absorption Spectra of Chlorophyll *a* in DMPC–DTAC Media

---

[Table S2](#) collects the wavelengths at maximum absorption and corresponding molar absorptivities of the chlorophyll *a* Soret and Q bands, in DMPC–DTAC media and in the reference solvent, diethyl ether.

**Table S2.** Electronic absorption spectral parameters of Chl *a* in pure DMPC liposomes, DMPC–DTAC mixtures at different D:L molar ratios, DTAC micelles and premicelle media, and diethyl ether. The Q and Soret wavelength maxima are denoted  $\lambda_Q$  and  $\lambda_S$ , and the corresponding molar absorptivities (estimated relatively to diethyl ether values)  $\epsilon_Q$  and  $\epsilon_S$ , respectively

| Media                          | $\lambda_S$<br>/nm | $\lambda_Q$<br>/nm | $10^{-4} \epsilon_S$<br>/(M <sup>-1</sup> cm <sup>-1</sup> ) | $10^{-4} \epsilon_Q$<br>/(M <sup>-1</sup> cm <sup>-1</sup> ) |
|--------------------------------|--------------------|--------------------|--------------------------------------------------------------|--------------------------------------------------------------|
| <b>DMPC liposomes</b>          | 437                | 671                | 4.3                                                          | 3.4                                                          |
| <b>Mixed vesicles/micelles</b> |                    |                    |                                                              |                                                              |
| <b>Vesicles, D:L = 0.3</b>     | 439                | 673                | 3.2                                                          | 2.3                                                          |
| <b>Vesicles, D:L = 1.0</b>     | 437                | 671                | 3.0                                                          | 2.2                                                          |
| <b>Vesicles, D:L = 2.0</b>     | 437                | 672                | 3.0                                                          | 2.3                                                          |
| <b>Vesicles, D:L = 4.0</b>     | 437                | 671                | 3.2                                                          | 2.3                                                          |
| <b>Vesicles, D:L = 6.7</b>     | 438                | 671                | 3.1                                                          | 2.3                                                          |
| <b>Micelles, D:L = 20</b>      | 437                | 670                | 2.8                                                          | 2.5                                                          |
| <b>Micelles, D:L = 33</b>      | 436                | 670                | 2.9                                                          | 2.5                                                          |
| <b>DTAC micelles</b>           | 436                | 669                | 1.8                                                          | 1.9                                                          |
| <b>Pre-micelle media</b>       |                    |                    |                                                              |                                                              |
| <b>DTAC, 5 mM</b>              | —                  | 670                | —                                                            | 0.8                                                          |
| <b>DTAC, 10 mM</b>             | 437                | 669                | 1.3                                                          | 1.3                                                          |
| <b>DTAC, 20 mM</b>             | 437                | 670                | 1.8                                                          | 2.1                                                          |
| <b>Diethyl ether</b>           | 429                | 661                | 11.7                                                         | 8.9                                                          |

### 3. Steady-State Fluorescence of Chlorophyll *a* in DTAC Media

Figure S1 illustrates fluorescence emission spectra of Chl *a* in DTAC pre-micelle and micelle media. Comparing with the solvent diethyl ether, the Chl *a* emission intensity is decreased in pre-micelle media at low DTAC concentrations. This enhanced quenching is likely caused by the formation of Chl aggregates, which are less emissive than monomers (see the [Main Article, FLIM Imaging](#) subsection). On the other hand, at large DTAC concentrations (in pure or mixed micelles) Chl–Chl interactions within the aggregates are disrupted and Chl monomers, with larger lifetimes, become dominant ([Main Article, Fluorescence Lifetimes](#) subsection). The maximum band intensity is a function of the DTAC concentration ([inset](#)), showing a marked singularity at  $22 \pm 1$  mM and stabilization afterwards. This value agrees quite well with the *CMC* of DTAC ( $\approx 22$ – $22.5$  mM) found by conductivity and surface tension measurements [5].

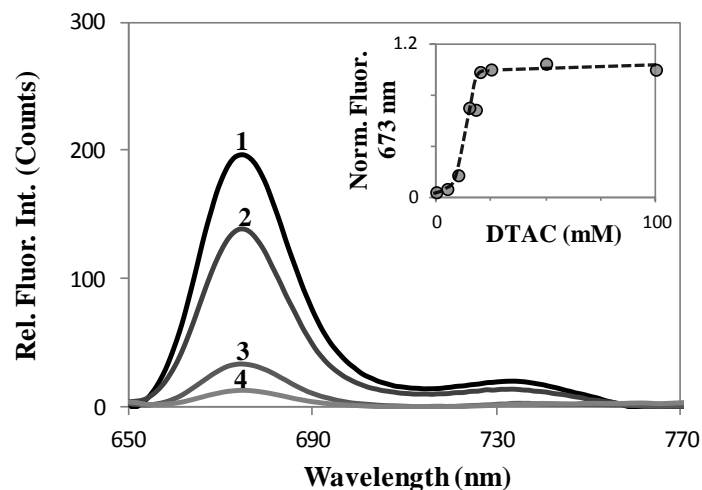

**Figure S1.** Emission spectra of Chl *a* in: DTAC micelles, at 50 mM DTAC (**1**) and DTAC pre-micelle media, at 15, 10, and 5 mM DTAC (**2**, **3**, and **4**, respectively). **Inset:** Effect of DTAC concentration on the maximum band intensity. Excitation at 638 nm

#### 4. Fluorescence Lifetimes of Chlorophyll *a* in DMPC–DTAC Media

**Figure S2 (A,B)** illustrates fluorescence emission decays of Chl *a* in diethyl ether, DMPC liposomes, DTAC–DMPC vesicles and micelles, and DTAC micelles. A sum of exponential functions, eq. 2 (Main Article), was reasonably fitted to the decays, with the obtained pre-exponentials (amplitudes) and lifetimes summarized in Table 1 (Main Article). **Figure S2 (C,D)** further correlates the lifetimes and amplitudes with the D:L molar ratios.

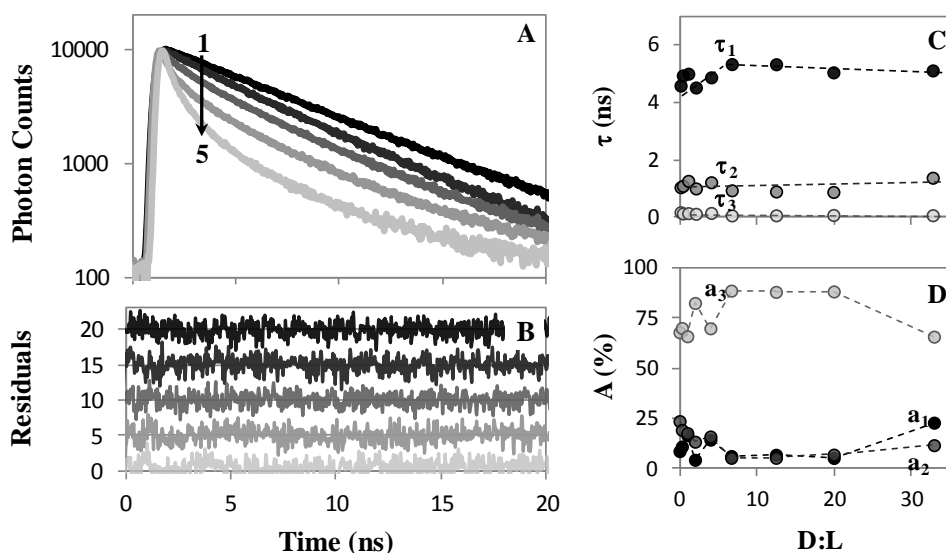

**Figure S2.** **A**, emission decays of Chl *a*, and **B**, residuals from their fits, to: a mono-exponential function in diethyl ether (**1**); a bi-exponential function in DTAC micelles (50 mM DTAC, **2**); and a tri-exponential function, in: mixed micelles, D:L = 33 (**3**); mixed liposomes, D:L = 1 (**4**); and DMPC liposomes (**5**). **C**, Lifetimes and **D**, Pre-exponentials obtained for Chl *a* in the DTAC–DMPC mixed system, as a function of D:L: the index **1** refers to monomers; and **2** and **3** to aggregates. Excitation: 638 nm. Emission: 667–722 nm.

Figure S3 (A,B) illustrates fluorescence emission decays of Chl *a* in DTAC pre-micelle media. The calculated pre-exponential and lifetime values are summarized in Table S3, where they are compared with those in pure DTAC micelles. Figure S3 (C,D) further correlates the lifetimes and amplitudes with the D:L molar ratios: the longer lifetime component  $a_1$  (Chl monomers) dominates in micelles, whereas the shorter lifetime component  $a_3$  (Chl aggregates) only appears in pre-micelle media.

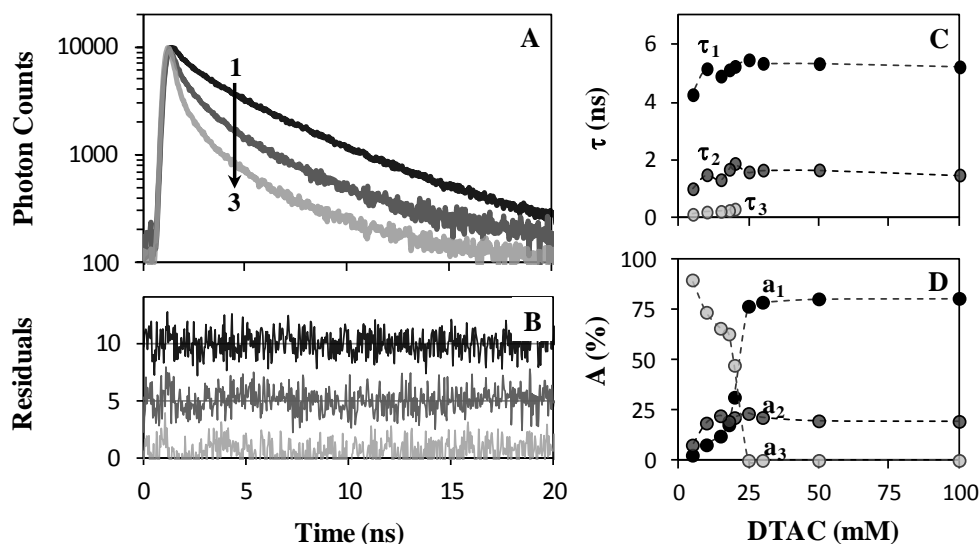

**Figure S3.** A, Fluorescence decays of Chl-*a*, and B, residuals from their fits to a tri-exponential function, in DTAC pre-micelle media, at 20, 10, and 5 mM DTAC (curves 1, 2, and 3 respectively). C and D, Lifetimes and pre-exponentials as a function of the DTAC concentration: the index 1 refers to monomers and 2 and 3 to aggregates. Excitation: 638 nm. Emission: 667–722 nm.

**Table S3.** Pre-exponentials ( $a$ ) and lifetimes ( $\tau$ ) obtained from the analysis of Chl *a* fluorescence decays in DTAC pre-micelle media, as compared with pure DTAC micelles

| Solvent Media           | $a_1$<br>/% | $\tau_1$<br>/ns | $a_2$<br>/% | $\tau_2$<br>/ns | $a_3$<br>/% | $\tau_3$<br>/ns |
|-------------------------|-------------|-----------------|-------------|-----------------|-------------|-----------------|
| <b>Premicelle media</b> |             |                 |             |                 |             |                 |
| DTAC, 5 mM              | 3           | 4.24            | 8           | 0.99            | 90          | 0.11            |
| DTAC, 10 mM             | 8           | 5.14            | 19          | 1.48            | 74          | 0.19            |
| DTAC, 20 mM             | 31          | 5.22            | 21          | 1.87            | 47          | 0.29            |
| <b>DTAC micelles</b>    | 80          | 5.32            | 20          | 1.64            | —           | —               |

The multi-exponential decays of Chl *a* in DTAC pre-micelle media evidence the coexistence of monomers and oligomers, with dominance of large oligomers. Three lifetime components were obtained: the *minor* population ( $\approx 4$ –5 ns) corresponds to Chl monomers and the two others ( $\approx 1$ –2;  $\approx 0.1$ –0.3 ns) to aggregates likely complexed with DTA<sup>+</sup> long ions (FLIM images of these complexes are seen in section 5).

## 5. FLIM Imaging of Chlorophyll *a* in DTAC Pre-Micelle Media

---

In pre-micelle media (at 5–15 mM DTAC), large (micro-sized) aggregates were found (Figure S4). Their lifetimes are given in panels A–C (color scale at left) and in their corresponding histograms (panels D–F), peaked at  $\approx 4.5$  ns. These big structures show irregular and heterogeneous morphologies. They are possibly Chl *a* unordered aggregates complexed with the detergent DTA<sup>+</sup> long ions. The size of these complexes tends to slightly increase with the increase in DTAC amount, up to the formation of micelles; thereafter, complexes completely disaggregate (Main Article, Figure 5E and Lifetime data).

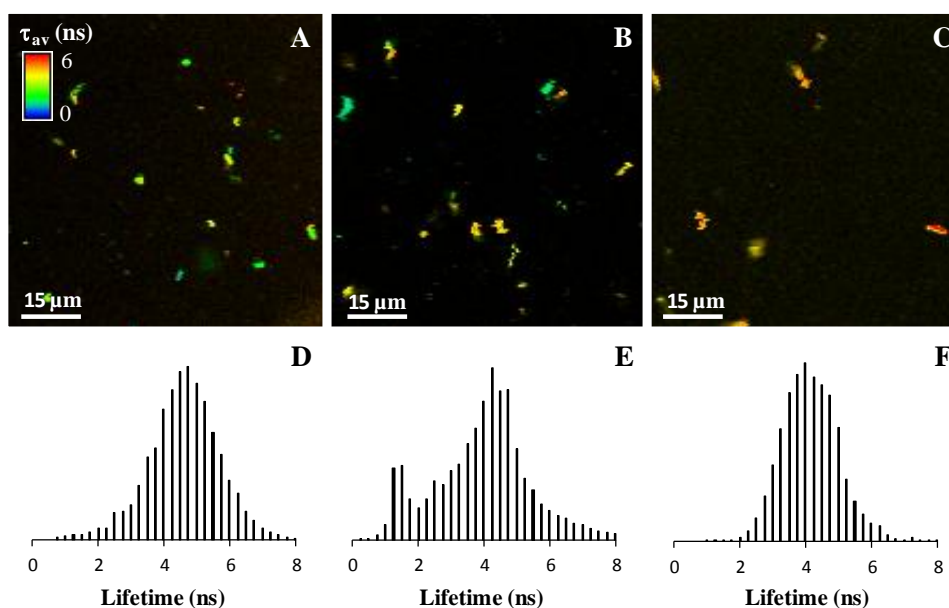

**Figure S4.** A–C: FLIM images of Chl *a* in DTAC pre-micelle solutions, at 5 (A), 10 (B), and 15 (C) mM DTAC. D–F: Normalized lifetime histograms for Chl *a*.

These results corroborate those from fluorescence lifetime measurements (see Table S3).

## 6. FCS Parameters for Chlorophyll *a* in DMPC–DTAC Media

---

FCS measurements were performed for Chl *a* incorporated in pure DMPC liposomes, DTAC micelles, and DTAC–DMPC vesicles and micelles. Figure 6 (Main Article) illustrated typical autocorrelation curves (1–5) and exemplified characteristic size distributions (insets). Herein, Table S4 displays the fitted parameters of the diffusion model; and the calculated equivalent diameters of the colloidal nanostructures, compared with those obtained by previous DLS measurements [4].

**Table S4.** FCS parameters of the free diffusion model (diffusion time  $\tau_D$  and diffusion coefficient  $D$ ) fitted to the experimental autocorrelation curves; and calculated neutral-sphere-equivalent diameters  $\Phi_e^a$  of the colloidal structures containing Chl *a*. Equivalent diameters obtained by DLS in the absence of probes  $\Phi_e^b$  are given for comparison.

| Sample                              | $\tau_D^a$ /ms | $D^a$ /( $\mu\text{m}^2 \text{s}^{-1}$ ) | $\Phi_e^a$ /nm | $\Phi_e^b$ /nm                |
|-------------------------------------|----------------|------------------------------------------|----------------|-------------------------------|
| <b>DMPC liposomes</b>               | 100–6000       | 0.095–6                                  | 100–5000       | 100–2000                      |
| <b>Vesicles, D:L = 1</b>            | 50–700         | 0.8–10                                   | 50–500         | $\approx 110$ ; $\approx 300$ |
| <b>Vesicles, D:L = 2</b>            | 40–450         | 1–30                                     | 30–350         | 90–100                        |
| <b>Vesicles, D:L = 4</b>            | 60–230         | 2–6.5                                    | 70–220         | $\approx 100$                 |
| <b>Disks, D:L=4</b>                 | $33 \pm 5$     | $17 \pm 3$                               | $25 \pm 4$     | 25–30                         |
| <b>Threads, D:L = 12.5</b>          | 100–750        | 0.5–5                                    | 80–700         | 30–400; >950                  |
| <b>Spherical micelles, D:L = 33</b> | $9.4 \pm 0.5$  | $60 \pm 3$                               | $7.1 \pm 0.3$  | $\approx 5.6$                 |
| <b>DTAC micelles</b>                | $6.1 \pm 0.3$  | $92 \pm 4$                               | $4.6 \pm 0.2$  | $4.0^c$                       |

<sup>a</sup> This work.

<sup>b</sup> From DLS measurements [4].

<sup>c</sup> From reference [6].

## REFERENCES

---

1. M. I. Viseu, T. I. Carvalho, S. M. B. Costa, *Biophys. J.* 2004, **86**, 2392.
2. M. I. Viseu, A. S. Tatikolov, R. F. Correia, S. M. B. Costa, *J. Photochem. Photobiol. A: Chem.* 2014, **000**, 000 (accepted).
3. V. J. Klenin, *Thermodynamics of Systems Containing Flexible-Chain Polymers*. Elsevier, Amsterdam, 1999. Chapter 2: *Fluctuations, Light Scattering and Diffusion*.
4. R. F. Correia, M. I. Viseu, T. J. V. Prazeres and J. M. G. Martinho, *J. Coll. Interface Sci.* 379 (2012) 56.
5. M. I. Viseu, M. M. Velázquez, C. S. Campos, I. García-Mateos, S. M. B. Costa, *Langmuir* 16 (2000) 4882.
6. B. L. Bales and R. Zana *J. Phys. Chem. B* 106 (2002) 1926.
